# Supplementary material for: Tortuosity and mass transfer limitations in industrial hydrotreating catalysts: effect of particle shape and size distribution
Source: Royal Society of Chemistry journal article supplement (doi:10.1039/c8cy00831k), 2018-01-01
Supplement: c8cy00831k1.pdf [file c8cy00831k1.pdf]

Electronic Supplementary Information for :

## Tortuosity and mass transfer limitations in industrial hydrotreating catalysts: effect of particles shape and size distribution

Svetan Kolitcheff<sup>a,b</sup>, Elsa Jolimaitre<sup>\*,b</sup>, Antoine Hugon<sup>b</sup>, Jan Verstraete<sup>b</sup>, Mickael Rivallan<sup>b</sup>, Pierre-Louis Carrette<sup>b</sup>, Françoise Couenne<sup>a</sup>, Mélaz Tayakout-Fayolle<sup>a</sup>

### Mean Molar Flux Radius evaluation (intraparticle mass transfer limitation)

Let's consider an ideal (perfectly mixed) stirred-tank reactor loaded with a liquid phase and porous particles (external mass transfer resistance is neglected). The molar balance on the reactor gives:

$$V_R \cdot \varepsilon_i \frac{dC_f}{dt} = - \sum_i n_T \cdot x_i \cdot V_i \varepsilon_p \cdot \frac{d\bar{C}_{i,p}}{dt} \quad (\text{SI.1.})$$

Where  $V_R$  is the reactor volume,  $\varepsilon_i$  the extragranular porosity,  $C_f$  the concentration in the fluid phase,  $n_T$  the total number of particles,  $x_i$  the number fraction of particles of volume  $V_i$ ,  $\varepsilon_p$  the intragranular porosity and  $\bar{C}_{i,p}$  the average concentration in the pore volume.

Considering spherical particles:

$$\frac{d\bar{C}_{i,p}(t)}{dt} = \frac{3}{R_{pi}^3} \int_0^{R_{pi}} r^2 \cdot \frac{\partial C_{i,p}(r,t)}{\partial t} \cdot dr \quad (\text{SI.2.})$$

For a Fickian diffusion, the mass balance in the particles provides the following expression:

$$\frac{\partial C_{i,p}(r,t)}{\partial t} = \frac{1}{r^2} \frac{\partial}{\partial r} (r^2 J_i(r,t)) \quad (\text{SI.3.})$$

$$\text{with: } J_i(r,t) = - D_{eff} \cdot \frac{\partial C_{i,p}(r,t)}{\partial r} \quad (\text{SI.4.})$$

Replacing equations (SI.2.) to (SI.4.) in (SI.1.) gives

$$V_R \cdot \varepsilon_i \frac{dC_f}{dt} = - \sum_{i=1}^m n_T \cdot x_i \cdot V_i \varepsilon_p \cdot \left( \frac{3}{R_{pi}^3} \int_0^{R_{pi}} \frac{\partial}{\partial r} (r^2 J_i(r,t)) \cdot dr \right) \quad (\text{SI.5.})$$

For a spherical particle:

$$V_i^3/R_{pi}^3 = 4.\pi \quad (\text{SI.6.})$$

By inserting (SI.6.) in (SI.5.) and carrying out the change of variable  $\rho = r/R_{pi}$ , we get:

$$V_R \cdot \varepsilon_i \cdot \frac{dC_f}{dt} = - \sum_i n_T \cdot x_i \cdot \varepsilon_p \cdot 4.\pi \cdot R_{pi} \cdot \int_0^1 \frac{\partial}{\partial \rho} (\rho^2 \cdot J_i(\rho, t)) \cdot d\rho \quad (\text{SI.7.})$$

The total number of particles is:

$$n_T = \frac{V_S}{V_n} \quad (\text{SI.8.})$$

Where  $V_S$  is the total solid volume and  $V_n$  is the average particle volume, defined by :

$$V_n = \sum_i x_i \cdot V_i \quad (\text{SI.9.})$$

$$V_S = (1 - \varepsilon_i) \cdot V_R \quad (\text{SI.10.})$$

Inserting equations (SI.8.) to (SI.10.) into (SI.7.) and considering that the mean molar flux density

$$J = \int_0^1 \frac{\partial}{\partial \rho} (\rho^2 \cdot J_i(\rho, t)) \cdot d\rho$$

is the same for all particles finally gives:

$$\frac{dC_f}{dt} = - \frac{(1 - \varepsilon_i)}{\varepsilon_i} \cdot \varepsilon_p \cdot 3 \cdot \frac{\sum_{i=1}^m x_i \cdot R_{pi}}{\sum_{i=1}^m x_i \cdot R_{pi}^3} \cdot J \quad (\text{SI.11.})$$

For spherical particles that are homogeneous in size, the molar balance is:

$$\frac{dC_f}{dt} = - \frac{(1 - \varepsilon_i)}{\varepsilon_i} \cdot \varepsilon_p \cdot \frac{3}{R_p^2} J \quad (\text{SI.12.})$$

Comparing equations (SI.11.) and (SI.12.) enables to define the mean radius as:

$$R_{mmf} = R_p = \sqrt{\frac{\sum_{i=1}^m x_i \cdot R_{pi}^3}{\sum_{i=1}^m x_i \cdot R_{pi}}}$$
